# Supplementary material
Source: PubMed Central journal article supplement (PMC2923460)
Supplement: NIHMS215366-supplement-01.pdf [file NIHMS215366-supplement-01.pdf]

**SUPPLEMENTAL INFORMATION:  
A Continuous-Flow, Microfluidic Fraction Collection Device**

*Christopher Baker and Michael G. Roper\**

*Department of Chemistry and Biochemistry, Florida State University, 95 Chieftain  
Way,  
Tallahassee, FL 32306*

Keywords: microfluidic, fraction collection, electrophoresis, separation

\*Address Correspondence to:

Dr. Michael G. Roper  
Department of Chemistry and Biochemistry  
Florida State University  
95 Chieftain Way  
Dittmer Building  
Tallahassee, FL 32306  
Ph 850-644-1846  
Fx 850-644-8281  
E-mail: [roper@chem.fsu.edu](mailto:roper@chem.fsu.edu)

**Table S1** ANOVA table for  $W_s$  response

| Source     | df | Sum of Squares | F value | Prob > F |
|------------|----|----------------|---------|----------|
| $\theta$   | 1  | 0.000096       | 0.6635  | 0.436 *  |
| $l$        | 1  | 0.09425        | 651     | < 0.0001 |
| $\theta l$ | 1  | 0.00555        | 38.3    | 0.00016  |
| Model      | 3  | 0.09990        | 230     | < 0.0001 |
| Error      | 9  | 0.001302       |         |          |

**Table S2** ANOVA table for  $L_{sf}$  response

| Source     | df | Sum of Squares | F value | Prob > F |
|------------|----|----------------|---------|----------|
| $\theta$   | 1  | 0.2772         | 271     | < 0.0001 |
| $l$        | 1  | 0.7164         | 700     | < 0.0001 |
| $\theta l$ | 1  | 0.00263        | 2.57    | 0.153 ** |
| $\theta^2$ | 1  | 0.04725        | 46.2    | 0.000253 |
| $l^2$      | 1  | 0.0011         | 1.08    | 0.334 ** |
| Model      | 5  | 1.059          | 207     | < 0.0001 |
| Error      | 7  | 0.001022       |         |          |

**Table S3** ANOVA table for  $W_c$  response

| Source   | df | Sum of Squares | F value | Prob > F |
|----------|----|----------------|---------|----------|
| $\theta$ | 1  | 0.03635        | 5.03    | < 0.0001 |
| $l$      | 1  | 0.2663         | 36.9    | < 0.0001 |
| Model    | 2  | 0.3026         | 20.9    | 0.000264 |
| Error    | 10 | 0.07213        |         |          |

\* insignificant, but retained for model hierarchy

\*\* statistically insignificant

df = degrees of freedom

Figure S1

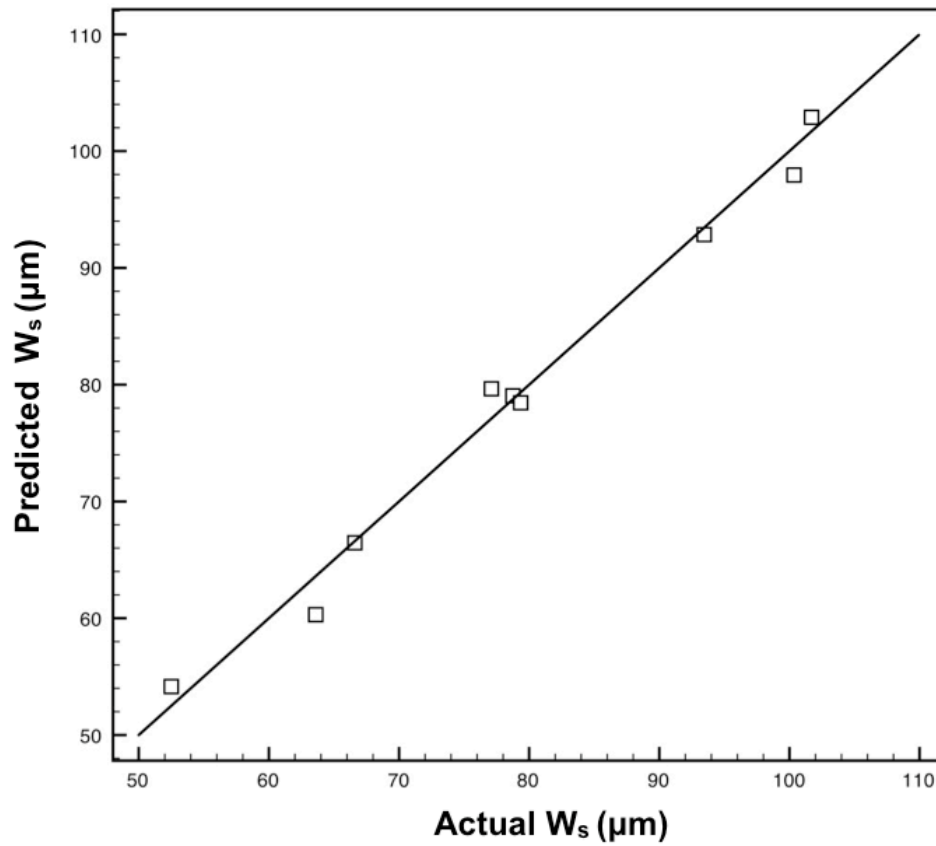

**Figure S1. Predicted value of  $W_s$  vs. actual values observed in simulations.** The response followed a two-factor interaction model ( $W_s = \beta + \theta + l + \theta l$ ). The linear trend between predicted values and those observed in simulation indicated agreement between the statistical model and simulation results ( $p < 0.0001$ ).

Figure S2

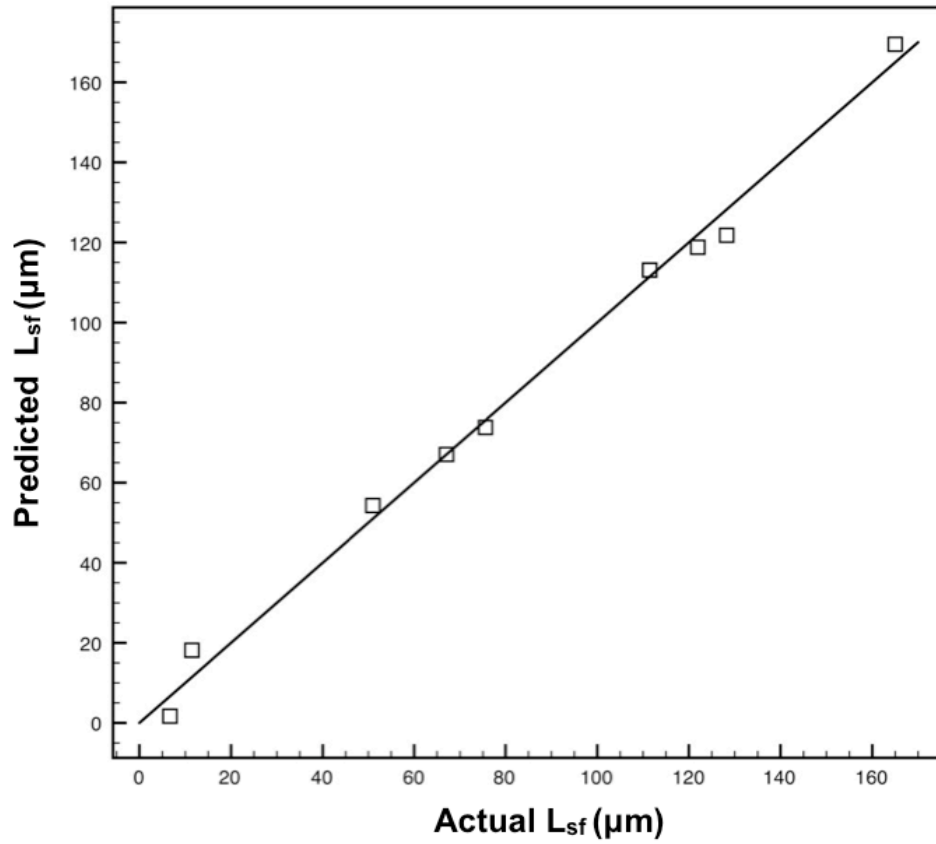

**Figure S2. Predicted value of  $L_{sf}$  vs. actual values observed in simulations.** The response followed a quadratic model ( $L_{sf} = \beta + \theta + l + \theta^2$ ) with  $p < 0.0001$ .

Figure S3

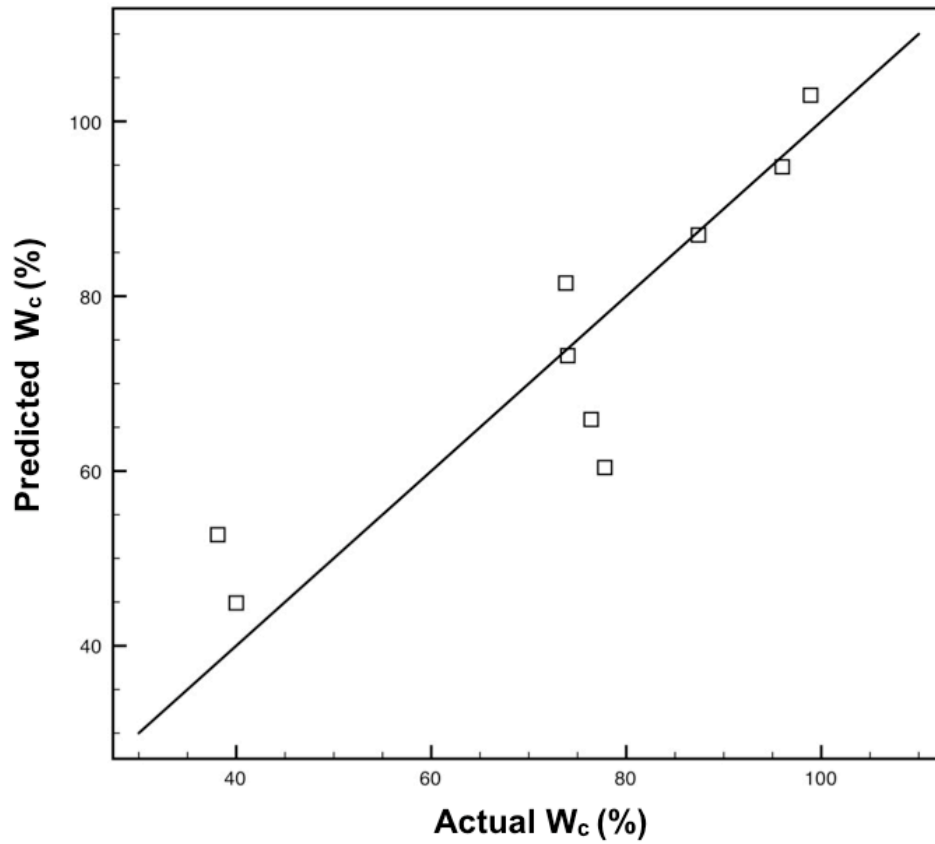

**Figure S3. Predicted value of  $W_c$  vs. actual values observed in simulations.** The response followed a linear model ( $W_c = \beta + \theta + \epsilon$ ). While there was spread among the data, especially at the lower end of the model, the model was statistically significant ( $p = 0.000264$ ).
